# Supplementary material for: A century of ecosystem change: human and seabird impacts on plant species extirpation and invasion on islands
Source: PeerJ. 2016 Jul 21;4:e2208. doi: 10.7717/peerj.2208 (PMC4963222; doi:10.7717/peerj.2208)
Supplement: Supplemental Information 3 — In the first tab (vegetation surveys on all island 2007–2012) we included for every plot the data on number of species and cover of species, separated in exotic and native species groups. We give fraction of litter, rock, moss, lichens and bare ground cover. We give mean soil depth in the plot as well as % carbon and nitrogen in the soil sample of the plot. In the second and third tab (vegetation surveys Mandarte Island 1986 and 2006) we included for all plots on Mandarte Island the fraction of grass, rock and shrub cover, species cover specific (several species of plants) and soil depth. [file peerj-04-2208-s003.xls]

## Sheet: Vegetation surveys 2007-2012
Code of plot	Name of island	Categorized as 'seabird island' or 'other island'	% cover invasive species	% cover native species	number of invasive species	number of native species	total number of species	% cover of bare ground	% cover of lichens	% cover of moss	% cover of rock	% cover of litter	mean soil depth	% concentration of total carbon in soil	% concentration of total nitrogen in soil
alec2-4	Alec Rocks	other island	0	0.69	0	2	2	0	0	0	0	55	75	50.4041	3.948
alec2-3	Alec Rocks	other island	0	0.527	0	9	9	0	0	0	2	45	14.3	31.3755	2.435
alec1-3	Alec Rocks	other island	0.009	0.69	3	14	17	2	2	9	7	10	5	41.8577	2.614
alec1-4	Alec Rocks	other island	0.014	0.794	3	12	15	0	0	0	0	25	17.8	24.4227	1.949
A1	Amelia Isl	other island	0.232	0.145	3	4	7	0	1	33	0	27	4.3	17.3397	1.408
A4	Amelia Isl	other island	0.142	0.296	3	3	6	0	19	0	0	34	22.8	18.9838	1.478
A7	Amelia Isl	other island	0.064	0.201	4	6	10	0	42	2	2	26	11.1	17.3012	1.537
ISAB1	Big Isabella ISB3 8.75	other island	0.001	0.506	1	10	11	0	0	43	9	7	5.8	32.1596	2.686
ISAB3	Big Isabella ISB3 8.75	other island	0.125	0.553	2	7	9	0	0	12	0	26	8.8	18.6891	1.571
boul1	Boulder Island	other island	0.024	0.84	3	13	16	0	0	0	2	30	10	15.6767	1.188
boul4	Boulder Island	other island	0.063	0.414	5	16	21	1	0	6	0	40	19	17.9808	1.547
CHM1	Channel Middle	other island	0.157	0.525	2	9	11	4	0	0	12	12	16	23.7804	1.94
CHM2	Channel Middle	other island	0.001	0.451	1	6	7	8	0	5	0	43	10	46.1901	2.222
Coon1	Coon Island	other island	0.051	0.556	5	9	14	0	0	0	0	40	37.8	26.5867	1.673
Coon4	Coon Island	other island	0.227	0.052	3	4	7	0	0	3	0	57	70.5	21.5244	1.059
DocN2	Dock North	other island	0.034	0.782	4	9	13	0	4	2	0	15	7	20.6917	1.367
DocN5	Dock North	other island	0.438	0.457	4	7	11	6	0	7	0	15	5.8	8.73327	0.776
DocS4	Dock South	other island	0	0.904	0	11	11	0	0	1	0	25	8	30.3765	2.033
DocS2	Dock South	other island	0	0.789	0	2	2	0	0	0	0	26	10.1	29.7914	2.184
DocS7	Dock South	other island	0.112	0.643	6	8	14	0	0	1	16	14	2.8	29.9591	1.933
fort3	Fortress Island	other island	0.109	0.555	5	11	16	3	0	0	8	17	19.3	26.5002	2.131
fort4	Fortress Island	other island	0.419	0.021	4	3	7	18	0	0	1	28	28	15.4644	1.392
LC3	Little Channel LC3 16	other island	0.032	0.565	5	3	8	2	0	0	8	26	15.8	29.7841	2.76
LI1	Long Islet	other island	0.014	0.567	2	4	6	0	0	0	0	65	75	14.8189	0.662
LI3	Long Islet	other island	0.351	0.02	2	2	4	0	0	0	0	70	75	33.1515	1.345
MCB3	McConnel Isl	other island	0.126	0.353	2	2	4	0	0	0	0	51	9.5	36.4408	2.604
MCB6	McConnel Isl	other island	0.47	0.15	8	4	12	0	0	3	2	19	5.3	21.1295	1.717
MCB7	McConnel Isl	other island	0.222	0.093	6	4	10	0	0	29	0	42	17	17.3313	1.034
MCC2	McConnel Isl	other island	0.034	0.44	3	10	13	0	0	5	1	38	8	20.6109	0.949
MCC3	McConnel Isl	other island	0.131	0.232	7	9	16	0	0	21	2	26	8.5	13.9791	0.943
nada1-3	North Ada	other island	0.027	0.267	2	2	4	2	0	0	11	60	6.8	9.36648	0.669
nada2-3	North Ada	other island	0	0.953	0	4	4	0	0	0	0	8	25.3	27.5728	1.294
nada2-5	North Ada	other island	0.046	0.299	4	17	21	0	25	14	6	15	6.8	15.4757	1.433
RE1	Reay Isl	other island	0.238	0.537	5	11	16	0	0	0	2	26	29.8	8.99764	0.743
RE4	Reay Isl	other island	0.173	0.21	9	11	20	3	0	2	2	51	5.1	6.32359	0.534
RE6	Reay Isl	other island	0.171	0.509	6	11	17	0	0	5	4	32	17.3	6.22075	0.526
rum1	Rum Isl	other island	0.016	0.527	5	7	12	0	0	0	8	40	12.3	18.1489	1.4
rum5	Rum Isl	other island	0.326	0.458	7	8	15	0	0	0	1	28	11.8	36.3951	2.694
sen4	Sentinel Isl	other island	0.12	0.528	6	7	13	0	0	0	0	32	40	7.77587	0.501
sen7	Sentinel Isl	other island	0.078	0.514	7	10	17	0	0	0	0	33	30.8	5.95283	0.437
sen9	Sentinel Isl	other island	0.565	0.078	11	3	14	0	0	0	0	30	43.3	3.9015	0.321
Sk2	Skull Island	other island	0.163	0.624	4	8	12	0	0	1	0	22	29	27.7219	2.379
Sk3	Skull Island	other island	0.091	0.64	11	7	18	0	0	20	0	10	7	26.5428	2.088
Sk6	Skull Island	other island	0.022	0.321	3	8	11	0	0	30	4	22	4.3	29.855	2.034
ISS1	Small Isabella ISS1 6	other island	0.04	0.42	1	9	10	0	1	42	11	5	6	29.1211	2.357
sada2	South Ada	other island	0.02	0.152	2	7	9	0	70	0	0	20	26	11.3378	0.742
sada6	South Ada	other island	0.001	0.417	1	6	7	0	15	0	0	37	8.5	15.6566	1.179
sada8	South Ada	other island	0.064	0.166	2	7	9	0	78	1	0	11	6	13.5583	0.936
win5	South Winchelsea	other island	0	0.51	0	2	2	0	26	0	18	25	7.3	25.9111	1.546
win7	South Winchelsea	other island	0.064	0.488	3	9	12	0	5	3	1	42	11.8	10.6265	0.709
wpi3	Wallace Point Island	other island	0.15	0.38	9	10	19	0	0	3	11	36	12.3	33.8315	2.536
wpi4	Wallace Point Island	other island	0.335	0.233	14	9	23	0	0	0	3	33	20.5	23.9874	1.714
wpi7	Wallace Point Island	other island	0.218	0.469	6	8	14	0	0	0	0	29	63.3	38.8178	2.373
y3-2	Yeo Island	other island	0.062	0.828	3	2	5	0	0	0	4	18	9.8	40.1279	3.028
y2-3	Yeo Island	other island	0.394	0.598	3	3	6	0	0	0	5	12	9	39.3106	3.028
y1-4	Yeo Island	other island	0.042	0.223	3	7	10	0	11	8	1	35	8.8	28.191	2.046
y1-6	Yeo Island	other island	0.006	1.025	1	10	11	0	0	0	0	16	21.8	28.1413	2.169
I1	Arbutus	seabird island	0	0.61	0	1	1	39	0	0	0	0	11	16.6582	1.619
I2	Arbutus	seabird island	0.494	0.5	3	1	4	0	0	0	0	0	10.8	18.8169	1.587
I3	Arbutus	seabird island	0.026	0.85	3	1	4	8	0	0	0	6	6.4	19.3217	1.893
I4	Arbutus	seabird island	0.041	0.872	3	5	8	2	0	0	0	3	12.1	24.3811	1.83
D1	Mandarte	seabird island	0.956	0.07	4	1	5	0	0	0	0	5	18.1	41.7494	3.812
D2	Mandarte	seabird island	0.4	0.57	3	3	6	0	0	0	0	8	10.2	45.3377	3.768
D3	Mandarte	seabird island	0.635	0.18	6	3	9	0	0	0	0	7	9.4	31.9405	2.585
D4	Mandarte	seabird island	0.265	0.65	3	1	4	0	0	0	0		21.9	46.0444	4.288
D5	Mandarte	seabird island	0.576	0.42	4	3	7	0	0	0	0	5	10.7	41.8286	3.508
D6	Mandarte	seabird island	0.744	0.08	4	1	5	0	0	0	0	15	8.4	25.8401	2.84
D7	Mandarte	seabird island	0.854	0.145	4	1	5	0	0	0	3	0	22.3	34.0588	3.269
D8	Mandarte	seabird island	1.012	0	4	0	4	0	0	0	0	0	13.6	40.1297	3.824
D9	Mandarte	seabird island	0.96	0.045	2	1	3	0	0	0	0	0	15.1	31.632	2.835
S1	Mandarte	seabird island	0.882	0.11	5	1	6	0	0	0	0	4	7.4	25.0236	2.676
S2	Mandarte	seabird island	0.844	0	5	0	5	7	0	0	0		1.1	28.5272	3.178
S6	Mandarte	seabird island	0.727	0.138	7	2	9	0	0	0	0	6	9.7	36.6768	3.259
S7	Mandarte	seabird island	0.564	0.27	4	1	5	0	1	0	9		3.3	24.3005	2.647
S9	Mandarte	seabird island	0.765	0	5	0	5	0	0	0	30		1.7	16.5039	1.913
M1	Satelite Island	seabird island	0.76	0.25	2	4	6	0	0	0	1	0	14.5	29.2486	2.934
M2	Satelite Island	seabird island	0.855	0.134	2	3	5	0	4	0	3	0	5.8	22.6988	2.3
M3	Satelite Island	seabird island	0.85	0.14	1	2	3	0	0	0	0	0	20.5	35.6535	3.468

## Sheet: Vegetation Survey Mandarte 1986
position according to Mandarte standard map	position according to Mandarte standard map	position in meters according to Mandarte standard map	position in meters according to Mandarte standard map	% cover shrub	% cover rock	% cover grass	shrub height (m)	soil depth under shrubs	soil depth under grass	meters of edges	% cover of Snowberry Symphoricarpos albus	% cover of Nootka Rose Rosa nutkana	% cover of Service Berry Amelanchier alnifolia	% cover of Oceanspray Holodiscus discolor	% cover of Salix species (S. Scouleriana and S. Lucia)	% cover of Garry Oak Quercus garryana	% cover of Gooseberry Ribes divercatum	% cover of Himalayan Blackberry Rubus armeniacus	% cover of Red Elderberry Sambucus racemosa	% cover of Choke Cherry Prunus virginia	% cover of other species	% cover of fireweed Epilobium angustifolium	% cover of nettles Urtica dioica	% cover of Cleavers Galium aparine	% cover of Fringecup Tellima grandiflora	% cover of Pea species (Lathyrus spec.)	% cover of Ferns
0	3	0	60	0	90	10	0	0	19	0	0	0	0	0	0	0	0	0	0	0	0	0	0	0	0	0	0
0	4	0	80	0	35	65	0	0	19	0	0	0	0	0	0	0	0	0	0	0	0	0	0	0	0	0	0
1	3	20	60	0	25	75	0	0	19	0	0	0	0	0	0	0	0	0	0	0	0	0	0	0	0	0	0
1	4	20	80	0	10	90	0	0	12	0	0	0	0	0	0	0	0	0	0	0	0	0	0	0	0	0	0
1	5	20	100	0	90	10	0	0	12	0	0	0	0	0	0	0	0	0	0	0	0	0	0	0	0	0	0
2	2	40	40	10	80	10	120	12	12	22	99	0	0	0	0	0	0	1	0	0	0	0	0	0	0	0	0
2	3	40	60	10	10	80	105	12	8	28	99	0	0	0	0	0	0	1	0	0	0	0	0	0	0	0	0
2	4	40	80	10	25	65	87	22	11	40	0	0	0	0	0	0	0	10	0	0	0	0	0	0	0	0	0
2	5	40	100	0	80	20	0	0	15	0	70	20	0	0	0	0	0	0	0	0	0	0	0	0	0	0	0
3	1	60	20	0	80	20	0	0	13	0	0	0	0	0	0	0	0	0	0	0	0	0	0	0	0	0	0
3	2	60	40	65	15	20	150	18	14	48	65	10	0	20	0	0	0	5	0	0	0	1	0	3	0	1	0
3	3	60	60	3	15	82	104	11	12	7	60	30	0	0	0	0	0	5	0	0	0	0	0	0	0	0	0
3	4	60	80	3	20	77	80	28	14	8	90	10	0	0	0	0	0	0	0	0	0	0	0	0	0	0	0
3	5	60	100	0	75	25	0	0	16	0	0	0	0	0	0	0	0	0	0	0	0	0	0	0	0	0	0
4	1	80	20	2	60	38	100	13	10	3	0	0	0	0	0	0	1	0	0	0	0	0	0	0	0	0	0
4	2	80	40	85	3	12	123	23	20	20	40	5	0	8	0	45	0	2	0	0	0	2	0	3	1	2	0
4	3	80	60	70	3	27	203	22	9	16	26	16	0	15	2	35	0	1	5	0	0	1	0	1	2	0	1
4	4	80	80	40	15	45	177	16	11	42	65	25	0	10	0	0	0	0	0	0	0	1	0	0	2	0	0
4	5	80	100	1	89	10	60	12	10	0	99	0	0	0	0	0	0	0	0	0	0	0	0	0	0	1	0
5	1	100	20	18	75	7	223	20	11	18	25	15	0	35	0	0	0	0	25	0	0	0	0	1	0	2	1
5	2	100	40	95	1	4	218	27	14	7	34	20	10	15	15	0	0	1	5	0	0	1	0	1	1	1	1
5	3	100	60	90	1	9	177	15	10	26	66	15	8	8	2	0	0	1	0	0	0	1	0	0	1	0	2
5	4	100	80	10	20	70	123	16	10	12	79	20	0	0	0	0	0	1	0	0	0	2	0	0	1	0	0
5	5	100	100	0	88	12	0	0	5	0	0	0	0	0	0	0	0	0	0	0	0	0	0	0	0	0	0
6	1	120	20	48	52	0	177	23	0	21	15	45	0	10	0	0	15	10	5	0	0	0	0	1	2	0	0
6	2	120	40	100	0	0	202	24	0	0	5	15	25	35	0	0	18	2	0	0	0	0	0	1	2	0	2
6	3	120	60	60	5	35	163	27	8	66	63	20	7	10	0	0	0	0	0	0	0	0	0	2	2	1	2
6	4	120	80	5	15	80	118	20	24	18	40	0	0	0	0	0	5	0	0	55	0	0	0	0	0	0	0
6	5	120	100	1	92	7	50	5	9	0	80	0	0	0	0	0	0	20	0	0	0	0	0	0	0	0	0
7	1	140	20	15	40	45	142	24	10	11	5	75	0	10	0	0	5	0	0	0	0	1	0	1	0	0	0
7	2	140	40	37	5	58	128	16	13	20	25	53	5	15	0	0	2	0	0	0	0	0	0	2	1	1	1
7	3	140	60	85	6	9	173	28	9	18	53	25	2	20	0	0	0	0	0	0	0	0	0	2	2	2	1
7	4	140	80	13	20	67	153	23	18	11	30	55	0	10	0	0	0	0	0	5	0	0	0	0	0	0	0
7	5	140	100	0	94	6	0	0	9	0	0	0	0	0	0	0	0	0	0	0	0	0	0	0	0	0	0
8	1	160	20	0	45	55	0	0	17	0	0	0	0	0	0	0	0	0	0	0	0	0	0	0	0	0	0
8	2	160	40	15	15	70	192	30	16	25	50	45	0	5	0	0	0	0	0	0	0	0	0	3	2	2	1
8	3	160	60	75	10	15	157	29	9	36	40	40	0	10	0	0	10	0	0	0	0	0	0	2	2	2	1
8	4	160	80	12	15	73	135	30	16	19	45	54	0	0	0	0	1	0	0	0	0	0	0	0	0	0	0
8	5	160	100	0	90	10	0	0	13	0	0	0	0	0	0	0	0	0	0	0	0	0	0	0	0	0	0
9	1	180	20	25	30	45	180	9	11	45	56	40	0	1	0	0	0	3	0	0	0	1	0	1	1	1	1
9	2	180	40	10	10	80	140	13	11	42	64	25	0	3	0	0	0	8	0	0	0	1	0	2	2	1	2
9	3	180	60	70	10	20	147	26	17	50	95	5	0	0	0	0	0	0	0	0	0	0	0	3	1	2	0
9	4	180	80	25	10	65	125	11	12	38	97	0	0	2	0	0	0	0	0	0	1	0	0	1	0	0	0
9	5	180	100	0	60	40	0	0	8	0	0	0	0	0	0	0	0	0	0	0	0	0	0	0	0	0	0
10	1	200	20	70	22	8	210	11	5	33	40	28	3	25	0	0	1	3	0	0	0	2	3	1	3	1	3
10	2	200	40	78	2	20	165	8	10	43	52	44	0	3	0	0	0	1	0	0	0	0	0	2	2	2	2
10	3	200	60	60	15	25	130	9	7	45	55	35	0	3	0	0	0	4	0	0	3	0	0	3	0	3	1
10	4	200	80	5	30	65	145	9	9	14	85	5	0	0	0	0	0	10	0	0	0	0	0	2	0	3	0
10	5	200	100	0	93	7	0	0	12	0	0	0	0	0	0	0	0	0	0	0	0	0	0	0	0	0	0
11	1	220	20	25	30	45	155	6	6	38	55	40	0	2	0	0	0	3	0	0	0	0	3	2	2	1	2
11	2	220	40	75	5	20	180	12	9	80	48	47	0	2	0	0	0	2	0	0	1	1	1	2	1	2	2
11	3	220	60	65	15	20	190	16	11	26	45	40	0	1	0	0	0	3	0	10	1	3	3	2	1	2	1
11	4	220	80	3	15	82	130	10	12	20	95	5	0	0	0	0	0	0	0	0	0	0	0	2	0	3	0
11	5	220	100	0	80	20	0	0	6	0	0	0	0	0	0	0	0	0	0	0	0	0	0	0	0	0	0
12	1	240	20	15	35	50	190	11	5	30	50	2	0	18	0	0	0	30	0	0	0	0	1	1	1	0	1
12	2	240	40	20	10	70	175	8	6	32	46	45	0	5	0	0	0	4	0	0	0	1	0	2	1	1	1
12	3	240	60	70	10	20	170	6	6	44	30	37	4	10	0	0	0	3	0	10	6	3	3	2	1	2	2
12	4	240	80	10	10	80	115	11	8	14	10	65	11	0	0	0	0	1	0	1	12	0	0	2	0	0	1
12	5	240	100	0	92	8	0	0	11	0	0	0	0	0	0	0	0	0	0	0	0	0	0	0	0	0	0
13	1	260	20	5	40	55	135	10	7	21	48	48	0	0	0	0	0	2	0	0	0	0	1	2	1	2	0
13	2	260	40	90	22	-12	195	9	9	33	44	44	0	0	1	0	0	7	0	1	3	0	0	2	1	2	2
13	3	260	60	97	1	2	160	8	6	8	46	23	4	4	1	0	0	6	0	10	6	2	3	3	1	2	2
13	4	260	80	80	8	12	110	9	7	57	55	36	0	0	0	0	0	5	0	1	3	0	0	3	0	1	0
13	5	260	100	10	30	60	160	8	8	12	99	1	0	0	0	0	0	0	0	0	0	0	0	1	0	0	0
14	1	280	20	7	55	38	105	12	8	12	92	1	0	45	0	0	0	3	0	0	0	0	0	3	1	2	0
14	2	280	40	65	7	28	175	7	8	32	50	37	5	2	1	0	0	5	0	0	0	0	0	3	2	2	2
14	3	280	60	85	4	11	200	7	7	21	38	20	25	10	1	0	0	5	0	0	1	2	1	3	2	3	2
14	4	280	80	55	15	30	140	9	7	22	49	48	0	0	0	0	0	2	0	0	1	0	0	3	0	3	1
14	5	280	100	1	20	79	130	9	6	0	0	99	0	0	0	0	0	0	0	0	0	0	0	0	0	0	0
15	1	300	20	0	30	70	0	0	10	0	0	0	0	0	0	0	0	0	0	0	0	0	0	0	0	0	0
15	2	300	40	0	30	70	0	0	10	0	0	0	0	0	0	0	0	0	0	0	0	0	0	0	0	0	0
15	3	300	60	30	17	53	150	7	8	30	40	35	0	2	0	0	0	23	0	0	0	0	0	2	1	3	1
15	4	300	80	10	7	83	115	6	5	14	47	47	3	0	0	0	0	3	0	0	0	0	0	1	0	0	1
15	5	300	100	0	96	4	0	0	7	0	0	0	0	0	0	0	0	0	0	0	0	0	0	0	0	0	0
16	1	320	20	5	60	35	145	7	8	17	60	20	0	0	0	0	0	17	3	0	0	0	0	0	1	2	0
16	2	320	40	35	22	43	175	11	7	44	48	42	0	0	0	0	0	10	0	0	0	0	0	0	0	3	0
16	3	320	60	82	4	14	150	6	8	40	87	4	0	1	0	0	0	8	0	0	0	0	0	3	1	3	0
16	4	320	80	15	20	65	100	8	8	40	61	30	0	3	0	0	0	2	0	4	0	0	0	3	0	0	0
16	5	320	100	0	95	5	0	0	11	0	0	0	0	0	0	0	0	0	0	0	0	0	0	0	0	0	0
17	1	340	20	2	54	44	115	10	9	5	25	25	0	0	0	0	50	0	0	0	0	0	0	0	0	0	0
17	2	340	40	0	35	65	0	0	8	0	0	0	0	0	0	0	0	0	0	0	0	0	0	0	0	0	0
17	3	340	60	70	13	17	130	8	11	29	48	40	0	2	0	0	0	8	0	0	2	0	0	3	1	3	1
17	4	340	80	30	15	55	100	10	7	34	60	30	0	0	0	0	0	10	0	0	0	0	0	1	0	0	0
17	5	340	100	0	97	3	0	0	8	0	0	0	0	0	0	0	0	0	0	0	0	0	0	0	0	0	0
18	1	360	20	25	70	5	170	8	7	36	82	10	0	0	0	0	0	8	0	0	0	2	0	1	1	2	1
18	2	360	40	40	20	40	175	9	8	77	24	70	0	3	0	0	0	2	0	0	0	1	0	2	1	1	1
18	3	360	60	99	0	1	190	9	7	10	29	59	0	3	0	0	0	3	0	5	1	3	0	3	2	2	2
18	4	360	80	40	6	54	140	7	8	54	31	65	0	3	0	0	0	1	0	0	0	0	0	2	0	0	1
18	5	360	100	0	95	5	0	0	11	0	0	0	0	0	0	0	0	0	0	0	0	0	0	0	0	0	0
19	1	380	20	17	65	18	150	9	10	17	20	70	0	0	0	0	0	10	0	0	0	3	0	0	1	0	0
19	2	380	40	30	22	48	190	9	9	42	60	33	0	2	0	0	0	4	0	1	0	0	0	1	1	0	1
19	3	380	60	80	15	5	165	7	8	56	26	65	0	5	0	0	0	2	0	2	0	2	0	3	1	3	2
19	4	380	80	30	30	40	150	7	9	32	37	60	2	0	0	0	0	1	0	0	0	0	0	3	0	0	1
19	5	380	100	0	70	30	0	0	11	0	0	0	0	0	0	0	0	0	0	0	0	0	0	0	0	0	0
20	1	400	20	0	97	3	0	0	11	0	0	0	0	0	0	0	0	0	0	0	0	0	0	0	0	0	0
20	2	400	40	73	13	14	293	10	14	40	40	29	4	12	0	0	0	1	2	12	0	0	0	1	2	1	3
20	3	400	60	97	2	1	218	10	7	6	28	60	0	0	0	0	0	2	1	8	1	0	0	2	2	2	2
20	4	400	80	37	16	47	143	6	6	57	19	70	0	0	0	0	2	1	0	8	0	0	0	3	1	3	1
20	5	400	100	0	65	35	0	0	8	0	0	0	0	0	0	0	0	0	0	0	0	0	0	0	0	0	0
21	2	420	40	40	20	40	192	16	13	71	35	35	0	8	8	0	0	12	2	0	0	0	1	2	2	2	3
21	3	420	60	90	3	7	250	10	10	44	50	26	0	4	8	0	0	3	1	8	0	0	0	3	2	2	3
21	4	420	80	70	10	20	145	8	9	77	32	64	0	0	0	0	1	3	0	0	0	0	0	2	1	2	1
21	5	420	100	0	85	15	0	0	8	0	0	0	0	0	0	0	0	0	0	0	0	0	0	0	0	0	0
22	2	440	40	98	1	1	188	31	14	18	27	3	0	1	25	0	0	27	17	0	0	1	1	0	2	0	2
22	3	440	60	97	1	2	298	22	10	12	22	15	2	6	30	0	2	15	6	0	2	0	1	0	2	0	3
22	4	440	80	40	15	45	138	6	5	44	30	62	0	0	0	0	0	2	1	2	3	0	0	2	1	2	1
22	5	440	100	1	84	15	100	4	8	0	0	85	0	0	0	0	0	15	0	0	0	0	0	0	0	0	0
23	1	460	20	1	89	10	150	5	10	0	0	0	0	0	0	0	99	0	0	0	0	0	0	0	0	0	0
23	2	460	40	70	10	20	260	16	10	21	16	0	0	1	40	0	0	35	7	0	1	0	0	0	1	0	1
23	3	460	60	93	3	4	270	14	5	52	5	50	3	8	16	0	0	5	10	1	2	0	0	2	1	0	2
23	4	460	80	30	15	55	140	8	6	40	60	33	0	5	0	0	0	2	0	0	0	0	0	1	1	1	1
23	5	460	100	1	92	7	45	6	9	0	0	25	0	0	0	0	0	75	0	0	0	0	0	0	0	0	0
24	1	480	20	8	79	13	255	25	12	19	23	0	0	0	23	0	22	1	31	0	0	0	0	0	0	0	0
24	2	480	40	90	6	4	380	21	7	7	5	0	0	0	35	0	3	30	26	0	1	0	0	0	0	0	1
24	3	480	60	100	0	0	410	12	0	0	2	0	0	3	25	0	1	40	28	0	1	0	3	0	1	0	1
24	4	480	80	80	2	18	250	7	7	22	40	30	4	2	10	0	1	10	3	0	0	0	2	2	3	1	2
24	5	480	100	1	87	12	100	8	7	1	10	24	66	0	0	0	0	0	0	0	0	0	0	0	0	0	0
25	1	500	20	8	65	27	165	9	9	28	50	15	0	0	10	0	0	15	10	0	0	0	0	0	1	0	0
25	2	500	40	15	35	50	150	12	7	31	35	0	0	6	45	0	0	6	6	0	2	0	0	0	1	0	1
25	3	500	60	70	15	15	175	8	7	36	68	5	0	8	0	0	0	5	6	2	6	0	0	0	2	0	2
25	4	500	80	30	18	52	125	6	7	81	85	13	1	0	0	0	0	1	0	0	0	0	0	3	2	2	1
25	5	500	100	1	91	8	140	13	11	0	0	0	0	0	0	0	0	0	0	99	0	0	0	0	0	0	0
26	1	520	20	23	60	17	160	11	8	56	76	0	0	0	0	0	12	12	0	0	0	2	0	1	1	0	0
26	2	520	40	2	35	63	135	9	7	9	50	50	0	0	0	0	0	0	0	0	0	1	0	0	0	0	0
26	3	520	60	60	16	24	205	8	8	65	60	6	3	10	0	0	0	15	1	4	1	0	0	2	2	0	1
26	4	520	80	20	15	65	145	9	6	48	75	10	0	2	0	0	0	1	0	12	0	0	0	1	0	1	0
26	5	520	100	0	92	8	0	0	13	0	0	0	0	0	0	0	0	0	0	0	0	0	0	0	0	0	0
27	1	540	20	38	60	2	250	14	6	10	35	0	0	21	22	0	21	1	0	0	0	0	0	0	2	0	2
27	2	540	40	55	23	22	185	9	10	49	37	30	0	11	1	0	6	11	4	0	0	0	0	2	2	2	2
27	3	540	60	70	15	15	260	10	8	57	10	44	40	5	0	0	0	1	0	0	0	0	2	3	3	0	2
27	4	540	80	8	20	72	80	8	9	19	50	20	0	15	0	0	0	15	0	0	0	0	0	0	0	0	0
27	5	540	100	0	93	7	0	0	13	0	0	0	0	0	0	0	0	0	0	0	0	0	0	0	0	0	0
28	1	560	20	15	70	15	190	9	10	13	48	5	0	0	0	0	0	47	0	0	0	0	0	0	1	0	1
28	2	560	40	40	40	20	155	10	10	63	68	30	0	0	0	0	0	2	0	0	0	0	0	3	2	1	1
28	3	560	60	90	5	5	265	11	6	28	9	50	16	8	16	0	0	1	0	0	0	0	3	2	2	2	2
28	4	560	80	15	10	75	105	10	8	33	24	74	0	0	0	0	0	2	0	0	0	0	0	3	0	0	0
28	5	560	100	0	98	2	0	0	10	0	0	0	0	0	0	0	0	0	0	0	0	0	0	0	0	0	0
29	1	580	20	0	85	15	0	0	16	0	0	0	0	0	0	0	0	0	0	0	0	0	0	0	0	0	0
29	2	580	40	0	40	60	0	0	14	0	0	0	0	0	0	0	0	0	0	0	0	0	0	0	0	0	0
29	3	580	60	65	25	10	190	13	13	51	30	45	15	3	3	0	1	3	0	0	0	0	3	3	3	2	2
29	4	580	80	15	70	15	90	10	10	20	10	82	0	0	0	0	7	1	0	0	0	0	0	3	0	0	0
30	1	600	20	5	70	25	180	9	16	9	5	90	0	0	0	0	0	0	5	0	0	0	0	0	0	0	0
30	2	600	40	50	25	25	170	14	14	63	78	12	0	3	0	0	0	1	6	0	0	0	0	2	2	1	1
30	3	600	60	80	6	14	285	11	12	47	26	18	50	3	0	0	0	3	0	0	0	1	2	3	2	0	2
30	4	600	80	3	77	20	901	11	15	0	33	67	0	0	0	0	0	0	0	0	0	0	0	0	0	0	0
31	1	620	20	15	65	20	215	11	15	5	0	93	0	0	0	0	3	1	3	0	0	0	0	0	1	0	0
31	2	620	40	30	30	40	185	9	9	40	9	75	0	0	0	0	13	3	0	0	0	0	0	1	2	1	1
31	3	620	60	55	15	30	235	13	11	50	35	27	25	9	0	0	2	1	0	0	0	0	0	2	3	0	3
31	4	620	80	0	80	20	0	0	11	0	0	0	0	0	0	0	0	0	0	0	0	0	0	0	0	0	0
32	1	640	20	0	85	15	0	0	12	0	0	0	0	0	0	0	0	0	0	0	0	0	0	0	0	0	0
32	2	640	40	2	55	43	150	11	11	2	10	90	0	0	0	0	0	0	0	0	0	0	0	0	0	0	0
32	3	640	60	40	35	25	190	13	13	27	58	30	0	0	0	0	0	12	0	0	0	0	0	0	3	0	1
33	2	660	40	0	20	80	0	0	14	0	0	0	0	0	0	0	0	0	0	0	0	0	0	0	0	0	0
33	3	660	60	5	75	20	100	13	16	4	0	25	0	0	0	0	75	0	0	0	0	0	0	0	0	0	0

## Sheet: Vegetation Survey Mandarte 2006
position according to Mandarte standard map	position according to Mandarte standard map	position in meters according to Mandarte standard map	position in meters according to Mandarte standard map	Plotnumber	% cover shrub	% cover rock	% cover grass	shrub height (m)	soil depth under shrubs	soil depth under grass	meters of edges	% cover of Snowberry Symphoricarpos albus	% cover of Nootka Rose Rosa nutkana	% cover of Service Berry Amelanchier alnifolia	% cover of Oceanspray Holodiscus discolor	% cover of Salix species (S. Scouleriana and S. Lucia)	% cover of Garry Oak Quercus garryana	% cover of Gooseberry Ribes divercatum	% cover of Himalayan Blackberry Rubus armeniacus	% cover of Red Elderberry Sambucus racemosa	% cover of Choke Cherry Prunus virginia	% cover of fireweed Epilobium angustifolium	% cover of nettles Urtica dioica	% cover of Cleavers Galium aparine	% cover of Fringecup Tellima grandiflora	% cover of Pea species (Lathyrus spec.)	% cover of Ferns	% cover of English Ivy Hedera helix	% cover of California Blackberry Rubus ursinus	% cover of other species	number of other species
0	0	3	60	1	0	70	30	0	0	13	0	0	0	0	0	0	0	0	0	0	0	0	0	0	0	0	0	0	0	0
0	0	4	80	2	0	35	65	0	0	16	0	0	0	0	0	0	0	0	0	0	0	0	0	0	0	0	0	0	0	0
1	20	3	60	3	0	40	60	0	0	12	0	0	0	0	0	0	0	0	0	0	0	0	0	0	0	0	0	0	0	0
1	20	4	80	4	0	20	80	0	0	13	0	0	0	0	0	0	0	0	0	0	0	0	0	0	0	0	0	0	0	0
1	20	5	100	5	0	85	15	0	0	7	0	0	0	0	0	0	0	0	0	0	0	0	0	0	0	0	0	0	0	0
2	40	2	40	6	4	15	81	1.3	17	14	5	70	0	0	0	0	0	0	0	0	0	0	0	0	0	0	0	0	30	0
2	40	3	60	7	1	19	80	0.5	0	16	5	50	0	0	0	0	0	0	0	0	0	0	0	0	0	0	0	0	50	0
2	40	4	80	8	1	25	74	0	0	12	6	50	0	0	0	0	0	0	0	0	0	0	0	0	0	0	0	0	50	0
2	40	5	100	9	0	90	10	0	0	5	0	0	0	0	0	0	0	0	0	0	0	0	0	0	0	0	0	0	0	0
3	60	1	20	10	0	75	25	0	0	13	0	0	0	0	0	0	0	0	0	0	0	0	0	0	0	0	0	0	0	0
3	60	2	40	11	20	7	73	1.8	18	20	40	75	5	0	5	0	0	0	0	0	0	10	0	0	0	0	0	0	0	0
3	60	3	60	12	0	70	30	0	0	11	0	0	0	0	0	0	0	0	0	0	0	0	0	0	0	0	0	0	0	0
3	60	4	80	13	0	90	10	0	0	6	0	0	0	0	0	0	0	0	0	0	0	0	0	0	0	0	0	0	0	0
3	60	5	100	14	0	95	5	0	0	14	0	0	0	0	0	0	0	0	0	0	0	0	0	0	0	0	0	0	0	0
4	80	1	20	15	0	55	45	0	0	11	0	0	0	0	0	0	0	0	0	0	0	0	0	0	0	0	0	0	0	0
4	80	2	40	16	83	2	15	2.2	12	15	47	50	1	0	10	0	20	0	5	0	0	2	6	0	0	0	0	0	1	0
4	80	3	60	17	80	2	18	2	14	7	27	15	20	0	15	0	20	0	15	3	0	2	0	0	0	0	2	0	8	0
4	80	4	80	18	55	5	40	130	21	8	45	3	1	0	1	0	0	0	93	0	0	2	0	0	0	0	0	0	0	0
4	80	5	100	19	1	15	84	0.9	0	17	2.5	0	0	0	0	0	0	0	0	100	0	0	0	0	0	0	0	0	0	0
5	100	1	20	20	20	75	5	2.1	17	2	4	8	3	0	12	0	0	0	50	25	0	0	2	0	0	0	0	0	0	0
5	100	2	40	21	97	0	3	1.9	19	8	5	7	5	13	5	8	0	0	51	1	0	2	5	0	0	0	1	0	2	0
5	100	3	60	22	65	5	30	1.8	12	8	35	10	10	0	7	0	0	0	48	3	0	10	0	0	0	0	2	0	10	0
5	100	4	80	23	5	70	25	1	0	13	14	5	0	0	0	0	0	5	70	10	0	5	0	0	0	0	0	0	5	0
5	100	5	100	24	1	30	69	0.5	0	13	3	98	0	0	0	0	0	0	0	0	0	0	0	0	0	0	0	0	0	1	Buckwheat
6	120	1	20	25	45	35	10	1.6	22	20	10	0	2	0	15	0	0	0	78	0	0	0	2	0	0	0	0	0	0	2	Buckwheat and nightshade
6	120	2	40	26	95	0	5	2.1	18	10	10	10	15	20	15	0	0	0	30	5	0	1	0	0	0	1	2	0	1	0
6	120	3	60	27	15	8	77	1.2	14	14	25	20	16	10	20	0	0	0	12	3	0	5	0	0	0	2	2	0	10	0
6	120	4	80	28	8	20	72	1	20	8	9	1	0	0	0	0	0	0	0	0	99	0	0	0	0	0	0	0	0	0
6	120	5	100	29	20	35	45	1	14	17	32	0	0	0	0	0	0	0	93	0	6	0	0	0	0	0	0	0	0	1	Buckwheat
7	140	1	20	30	0	75	25	0	0	18	0	0	0	0	0	0	0	0	0	0	0	0	0	0	0	0	0	0	0	0
7	140	2	40	31	20	15	65	1.9	20	18	25	50	20	10	10	0	0	0	5	0	0	0	0	0	0	0	0	0	5	0
7	140	3	60	32	65	5	30	1.5	16	9	25	45	25	0	25	0	0	0	0	2	0	0	0	0	0	0	0	0	3	0
7	140	4	80	33	5	25	70	1	15	14	5	50	50	0	0	0	0	0	0	0	0	0	0	0	0	0	0	0	0	0
7	140	5	100	34	0	45	55	0	0	19	0	0	0	0	0	0	0	0	0	0	0	0	0	0	0	0	0	0	0	0
8	160	1	20	35	0	25	75	0	0	18	0	0	0	0	0	0	0	0	0	0	0	0	0	0	0	0	0	0	0	0
8	160	2	40	36	15	20	65	1.5	30	12	21	80	15	0	0	0	0	0	0	5	0	0	0	0	0	0	0	0	0	0
8	160	3	60	37	25	15	60	1.7	17	16	23	35	20	0	20	0	0	0	5	10	0	0	0	0	0	0	0	0	5	5	Mahonia
8	160	4	80	38	15	10	75	1.2	25	12	12	25	35	0	10	0	0	0	20	0	0	0	0	0	0	0	0	0	5	5	Mahonia
8	160	5	100	39	0	60	40	0	0	18	0	0	0	0	0	0	0	0	0	0	0	0	0	0	0	0	0	0	0	0
9	180	1	20	40	10	50	40	1.3	26	15	11	20	10	0	10	0	0	0	50	0	0	10	0	0	0	0	0	0	0	0
9	180	2	40	41	20	15	65	1.3	13	9	30	50	20	0	5	0	0	0	20	0	0	0	0	0	0	0	0	0	5	0
9	180	3	60	42	80	5	15	1.9	16	30	45	35	15	0	0	0	0	0	40	0	0	0	0	0	0	0	0	0	10	0
9	180	4	80	43	5	10	85	0.9	30	11.6	8	85	0	0	0	0	0	0	10	0	0	0	0	0	0	0	0	0	5	0
9	180	5	100	44	0	60	40	0	0	7	0	0	0	0	0	0	0	0	0	0	0	0	0	0	0	0	0	0	0	0
10	200	1	20	45	65	30	5	2	25	13	10	10	10	0	10	0	0	0	55	0	0	10	5	0	0	0	0	0	0	0
10	200	2	40	46	45	5	50	1.3	15	17	55	45	20	0	5	0	0	0	20	0	0	1	1	1	0	1	0	0	1	5	Mahonia
10	200	3	60	47	25	20	55	0.9	20	21	55	40	25	0	10	0	0	0	5	0	0	5	0	5	0	0	0	0	10	0
10	200	4	80	48	1	20	79	0.3	12	15	2	0	100	0	0	0	0	0	0	0	0	0	0	0	0	0	0	0	0	0
10	200	5	100	49	0	70	30	0	0	12	0	0	0	0	0	0	0	0	0	0	0	0	0	0	0	0	0	0	0	0
11	220	1	20	50	40	40	20	1	21	13	34	40	5	0	5	0	0	0	5	20	0	0	20	0	0	0	0	0	5	0
11	220	2	40	51	50	5	45	1.9	15	13	45	30	45	0	5	0	0	0	0	0	0	10	5	5	0	0	0	0	0	0
11	220	3	60	52	40	20	40	1.5	19	21	25	35	45	0	5	0	0	0	0	0	0	5	0	0	0	0	0	0	5	5	Mahonia
11	220	4	80	53	5	20	80	0.3	0	12	5	50	0	0	0	0	0	0	0	0	0	0	0	0	0	0	0	0	0	0
11	220	5	100	54	0	40	60	0	0	16	0	0	0	0	0	0	0	0	0	0	0	0	0	0	0	0	0	0	0	0
12	240	1	20	55	20	10	70	1.5	16	7	30	40	0	0	20	0	0	0	0	30	0	0	0	0	0	0	0	0	10	0
12	240	2	40	56	20	20	60	2	27	12	25	30	35	0	15	0	0	0	0	0	0	15	0	0	0	0	0	0	10	0
12	240	3	60	57	80	5	15	1.2	19	22	35	25	25	0	10	0	0	0	0	0	5	15	5	0	0	5	0	0	1	9	Mahonia
12	240	4	80	58	20	15	65	0.7	18	12	45	60	25	5	0	0	0	0	0	5	0	0	0	0	0	0	0	0	0	5	Mahonia
12	240	5	100	59	0	65	35	0	0	16	0	0	0	0	0	0	0	0	0	0	0	0	0	0	0	0	0	0	0	0
13	260	1	20	60	0	50	50	0	0	8	0	0	0	0	0	0	0	0	0	0	0	0	0	0	0	0	0	0	0	0
13	260	2	40	61	15	25	60	1	15	16	30	45	45	5	0	0	0	0	0	0	0	0	0	0	0	0	0	0	5	0
13	260	3	60	62	90	0	10	1.3	17	15	15	50	10	5	5	0	0	0	0	0	5	10	10	0	0	0	0	0	5	0
13	260	4	80	63	30	10	60	0.7	12	9	60	40	50	0	0	0	0	0	0	0	0	0	0	0	0	0	0	0	5	5	Mahonia
13	260	5	100	64	5	45	50	0.5	20	12	10	0	100	0	0	0	0	0	0	0	0	0	0	0	0	0	0	0	0	0
14	280	1	20	65	15	65	20	1.2	25	19	25	10	0	0	0	0	0	0	0	10	0	0	80	0	0	0	0	0	0	0
14	280	2	40	66	70	10	20	1.2	19.3	11	40	30	25	5	5	0	0	0	0	15	0	0	10	0	0	0	5	0	5	0
14	280	3	60	67	85	5	10	2.7	21	6	45	20	15	30	10	0	0	0	0	10	0	0	5	0	0	0	5	0	5	0
14	280	4	80	68	15	15	70	0.5	9	6	25	50	40	0	0	0	0	0	0	0	0	0	0	0	0	0	0	0	10	0
14	280	5	100	69	0	70	30	0	0	14	0	0	0	0	0	0	0	0	0	0	0	0	0	0	0	0	0	0	0	0
15	300	1	20	70	0	60	40	0	0	12	0	0	0	0	0	0	0	0	0	0	0	0	0	0	0	0	0	0	0	0
15	300	2	40	71	5	25	70	0.7	26	14	25	40	60	0	0	0	0	0	0	0	0	0	0	0	0	0	0	0	0	0
15	300	3	60	72	95	0	5	1.3	22	5	30	25	15	0	10	0	0	5	40	0	0	0	0	0	0	0	5	0	0	0
15	300	4	80	73	20	10	70	0.7	14	7	30	40	50	0	5	0	0	0	0	0	0	0	0	0	0	0	0	0	5	0
15	300	5	100	74	0	65	35	0	0	14	0	0	0	0	0	0	0	0	0	0	0	0	0	0	0	0	0	0	0	0
16	320	1	20	75	1	79	20	0.3	30	15	1	60	40	0	0	0	0	0	0	0	0	0	0	0	0	0	0	0	0	0
16	320	2	40	76	15	25	60	1.9	30	12	30	25	15	0	0	0	0	0	10	45	0	0	0	0	0	0	0	0	5	0
16	320	3	60	77	75	10	15	1.2	20	13	40	35	40	0	0	0	0	0	5	10	0	0	5	0	0	0	0	0	5	0
16	320	4	80	78	10	15	75	0.5	16	9	15	15	80	0	0	0	0	0	0	0	0	0	0	0	0	0	0	0	5	0
16	320	5	100	79	0	65	35	0	0	13	0	0	0	0	0	0	0	0	0	0	0	0	0	0	0	0	0	0	0	0
17	340	1	20	80	5	80	15	1	23	14	5	0	0	0	0	0	0	100	0	0	0	0	0	0	0	0	0	0	0	0
17	340	2	40	81	0	55	45	0	0	9	0	0	0	0	0	0	0	0	0	0	0	0	0	0	0	0	0	0	0	0
17	340	3	60	82	45	15	40	1.5	14	7	45	25	65	0	0	0	0	0	0	0	0	0	0	0	0	0	0	0	5	5	Mahonia
17	340	4	80	83	15	10	75	0.9	29	6	28	25	40	0	25	0	0	0	0	0	0	0	0	0	0	0	0	0	10	0
17	340	5	100	84	1	24	75	1	0	10	4	0	0	0	0	0	0	0	0	100	0	0	0	0	0	0	0	0	0	0
18	360	1	20	85	20	65	15	1.2	17	10	30	60	10	0	0	0	0	0	0	10	0	10	0	0	0	0	0	0	10	0
18	360	2	40	86	15	25	60	0.9	20	9	25	15	50	0	20	0	0	0	5	10	0	0	0	0	0	0	0	0	0	0
18	360	3	60	87	80	5	15	1.6	18	6	45	15	60	0	5	0	0	0	0	5	0	5	5	0	0	0	0	0	5	0
18	360	4	80	88	40	15	45	0.7	11	6	55	10	80	0	5	0	0	0	5	0	0	0	0	0	0	0	0	0	0	0
18	360	5	100	89	15	20	65	1.4	20	14	18	0	0	0	0	0	0	0	100	0	0	0	0	0	0	0	0	0	0	0
19	380	1	20	90	15	75	10	1	30	8	25	5	25	0	0	0	0	0	45	20	0	5	0	0	0	0	0	0	0	0
19	380	2	40	91	10	65	25	1.2	13	12	25	30	55	0	5	0	0	0	5	0	0	0	0	0	0	0	0	0	5	0
19	380	3	60	92	85	0	15	1.2	13	13	45	10	65	0	5	0	0	0	5	0	0	5	5	0	0	5	0	0	0	0
19	380	4	80	93	25	10	65	0.9	15	7	40	45	45	0	0	0	0	0	10	0	0	0	0	0	0	0	0	0	0	0
19	380	5	100	94	5	45	50	0.4	10	11	10	0	85	0	0	0	0	0	0	15	0	0	0	0	0	0	0	0	0	0
20	400	1	20	95	15	75	10	2	16	14	20	5	0	0	0	0	0	0	95	0	0	0	0	0	0	0	0	0	0	0
20	400	2	40	96	95	0	5	2	20	12	10	25	15	0	15	0	0	0	40	5	0	0	0	0	0	0.5	0	0	0	0
20	400	3	60	97	85	0	15	1.8	19	5	20	40	50	0	0	0	0	0	0	10	0	0	0	0	0	0	0	0	0	0
20	400	4	80	98	10	5	85	0.5	30	10	15	20	80	0	0	0	0	0	0	0	0	0	0	0	0	0	0	0	0	0
20	400	5	100	99	0	35	65	0	0	9	0	0	0	0	0	0	0	0	0	0	0	0	0	0	0	0	0	0	0	0
21	420	1	20	100	0	95	5	0	0	9	0	0	0	0	0	0	0	0	0	0	0	0	0	0	0	0	0	0	0	0
21	420	2	40	101	45	10	45	1.6	23	11	50	5	0	0	10	0	0	0	75	10	0	0	0	0	0	0	0	0	0	0
21	420	3	60	102	85	5	10	1.9	19	5	20	25	10	0	5	30	0	0	10	10	0	0	0	0	0	0	0	5	5	0
21	420	4	80	103	20	5	75	0.9	22	14	30	45	45	0	0	0	0	0	0	0	0	0	0	0	0	0	0	5	5	0
21	420	5	100	104	1	54	45	0.4	15	14	5	0	100	0	0	0	0	0	0	0	0	0	0	0	0	0	0	0	0	0
22	440	2	40	105	98	1	1	1.7	28	10	5	0	0	0	0	0	0	0	35	25	0	0	30	0	0	0	0	5	0	5	Nightshade
22	440	3	60	106	98	1	1	2.9	30	12	3	0	0	5	5	10	0	0	40	40	0	0	0	0	0	0	0	0	0	0
22	440	4	80	107	20	10	70	1.3	16	5	30	30	30	0	0	0	0	0	30	5	0	0	0	0	0	0	0	5	0	0
22	440	5	100	108	1	75	24	0.3	20	10	2	0	100	0	0	0	0	0	0	0	0	0	0	0	0	0	0	0	0	0
23	460	1	20	109	2	88	10	0.7	0	16	2	0	0	0	0	0	0	0	40	60	0	0	0	0	2	0	0	0	0	0
23	460	2	40	110	65	10	25	3	28	7	25	0	0	0	0	35	0	0	45	15	0	0	0	0	0	0	0	5	0	0
23	460	3	60	111	99	1	0	3.2	30	0	1	2	3	0	5	0	0	0	45	45	0	0	0	0	0	0	0	0	0	0
23	460	4	80	112	25	20	55	1.8	22	6	40	25	25	0	5	10	0	0	25	5	0.5	0	0	0	0	0	0	0	5	0
23	460	5	100	113	10	70	20	0.6	22	14	10	15	15	0	0	0	0	0	50	0	10	0	0	0	0	0	0	0	10	0
24	480	1	20	114	20	75	5	1.5	22	9	20	0	0	0	0	0	0	2	90	5	0	0	0	0	0	0	0	0	0	3	Nightshade
24	480	2	40	115	95	1	4	3	29	5	10	0	0	0	0	35	0	0	30	35	0	0	0	0	0	0	0	0	0	0
24	480	3	60	116	100	0	0	3.5	30	0	0	5	0	0	0	20	0	0	35	35	0	0	0	0	0	0	0	5	0	0
24	480	4	80	117	50	5	45	1.2	16	17	40	35	15	0	0	15	0	0	20	10	0	0	0	0	0	0	0	5	0	0
24	480	5	100	118	15	60	25	0.6	15	9	12	80	5	0	0	0	0	0	5	0	10	0	0	0	0	0	0	0	0	0
25	500	1	20	119	15	65	20	1	30	16	20	0	0	0	0	0	0	0	95	0	0	5	0	0	0	0	0	0	0	0
25	500	2	40	120	5	15	80	0.3	15	10	22	10	0	0	0	10	0	0	60	0	0	0	0	0	0	0	0	0	20	0
25	500	3	60	121	80	5	15	1.4	15	4	45	25	15	0	5	0	0	0	25	5	0	0	0	0	0	0	5	10	2	8	Mahonia and Nightshade
25	500	4	80	122	10	15	75	0.5	16	9	25	80	5	0	0	0	0	0	0	0	0	0	0	0	0	0	0	5	10	0
25	500	5	100	123	10	30	60	0.5	20	10	25	0	10	0	0	0	0	0	90	0	0	0	0	0	0	0	0	0	0	0
26	520	1	20	124	10	50	40	1	30	10	25	70	0	0	0	0	0	0	10	10	0	10	0	0	0	0	0	0	0	0
26	520	2	40	125	5	25	70	0.9	23	14	8	0	0	0	0	0	0	0	95	0	0	0	0	0	0	0	0	0	5	0
26	520	3	60	126	75	5	20	2.2	24	11	40	25	10	10	10	0	0	0	35	5	0	0	0	0	0	0	5	0	0	0
26	520	4	80	127	5	5	90	0.6	20	10	12	40	0	0	5	0	0	0	45	0	10	0	0	0	0	0	0	0	0	0
26	520	5	100	128	0	50	50	0	0	8	0	0	0	0	0	0	0	0	0	0	0	0	0	0	0	0	0	0	0	0
27	540	1	20	129	23	75	2	2.4	18	8	7	0	0	0	5	25	0	10	60	0	0	0	0	0	0	0	0	0	0	0
27	540	2	40	130	40	15	45	1.9	24	16	35	0	10	0	0	0	0	0	85	0	0	0	0	0	0	0.5	5	0	0	0
27	540	3	60	131	50	5	45	3.2	26	11	45	10	20	45	5	0	0	0	10	10	0	0	0	0	0	0	0	0	0	0
27	540	4	80	132	10	5	85	0.4	15	9	20	20	35	0	15	0	0	0	35	0	0	0	0	0	0	0	0	0	0	0
27	540	5	100	133	0	75	25	0	0	7	0	0	0	0	0	0	0	0	0	0	0	0	0	0	0	0	0	0	0	0
28	560	1	20	134	10	85	5	1	30	17	10	0	0	0	0	0	0	0	100	0	0	0	0	0	0	0	0	0	0	0
28	560	2	40	135	55	10	35	1	23	11	45	10	40	0	0	0	0	0	50	0	0	0	0	0	0	0	0	0	0	0
28	560	3	60	136	85	15	0	1.9	26	0	25	15	50	5	5	5	0	0	20	0	0	0	0	0	0	0	0	0	0	0
28	560	4	80	137	10	20	70	0.3	7	9	10	0	100	0	0	0	0	0	0	0	0	0	0	0	0	0	0	0	0	0
28	560	5	100	138	0	75	25	0	0	15	0	0	0	0	0	0	0	0	0	0	0	0	0	0	0	0	0	0	0	0
29	580	1	20	139	0	90	10	0	0	30	0	0	0	0	0	0	0	0	0	0	0	0	0	0	0	0	0	0	0	0
29	580	2	40	140	0	55	45	0	0	12	0	0	0	0	0	0	0	0	0	0	0	0	0	0	0	0	0	0	0	0
29	580	3	60	141	65	20	15	1.4	29	6	40	50	20	10	10	0	0	0	5	0	0	0	5	0	0	0	0	0	0	0
29	580	4	80	142	15	45	40	0.4	18	8	22	5	90	0	0	0	0	0	0	5	0	0	0	0	0	0	0	0	0	0
30	600	1	20	143	5	80	15	1	30	9	10	10	90	0	0	0	0	0	0	0	0	0	0	0	0	0	0	0	0	0
30	600	2	40	144	25	15	60	1.6	21	8	30	10	70	0	0	0	0	0	5	15	0	0	0	0	0	0	0	0	0	0
30	600	3	60	145	85	10	5	2.8	22	5	30	20	30	25	10	0	0	0	5	10	0	0	0	0	0	0	0	0	0	0
30	600	4	80	146	5	50	45	0.4	16	9	15	0	50	0	0	0	0	0	50	0	0	0	0	0	0	0	0	0	0	0
31	620	1	20	147	10	80	10	1	30	10	10	0	90	0	0	0	0	0	0	10	0	0	0	0	0	0	0	0	0	0
31	620	2	40	148	5	50	45	0.9	14	7	10	0	50	0	0	0	0	0	0	50	0	0	0	0	0	0	0	0	0	0
31	620	3	60	149	70	10	20	1.3	22	14	40	25	15	20	15	0	0	0	25	0	0	0	0	0	0	0	0	0	0	0
31	620	4	80	150	0	50	50	0	0	11	0	0	0	0	0	0	0	0	0	0	0	0	0	0	0	0	0	0	0	0
32	640	1	20	151	0	85	15	0	0	6	0	0	0	0	0	0	0	0	0	0	0	0	0	0	0	0	0	0	0	0
32	640	2	40	152	0	50	50	0	0	15	0	0	0	0	0	0	0	0	0	0	0	0	0	0	0	0	0	0	0	0
32	640	3	60	153	85	5	10	1.1	18	10	45	35	15	0	0	0	0	0	50	0	0	0	0	0	0	0	0	0	0	0
32	640	4	80	154	0	50	50	0	0	12	0	0	0	0	0	0	0	0	0	0	0	0	0	0	0	0	0	0	0	0
33	660	1	20	155	0	95	5	0	0	7	0	0	0	0	0	0	0	0	0	0	0	0	0	0	0	0	0	0	0	0
33	660	2	40	156	0	75	25	0	0	8	0	0	0	0	0	0	0	0	0	0	0	0	0	0	0	0	0	0	0	0
33	660	3	60	157	5	50	45	1	17	9	8	5	10	0	0	0	0	0	85	0	0	0	0	0	0	0	0	0	0	0
